# Supplementary material for: Efficacy and Safety of Medication for Attention-Deficit Hyperactivity Disorder in Children and Adolescents with Common Comorbidities: A Systematic Review
Source: PubMed Central journal article supplement — Neurol Ther. 2021 Jun 4;10(2):499–522. doi: 10.1007/s40120-021-00249-0 (PMC8571469; doi:10.1007/s40120-021-00249-0), 2021-06-04
Supplement: 40120_2021_249_MOESM1_ESM.pdf [file 40120_2021_249_MOESM1_ESM.pdf]

## Supplementary information

Efficacy and safety of medication for attention-deficit hyperactivity disorder in children and adolescents with common comorbidities: A systematic review

Noa Tsujii\*, Masahide Usami\*, Noriyuki Naya, Toshinaga Tsuji, Hirokazu Mishima, Junko Horie, Masakazu Fujiwara, Junzo Iida

\* These authors contributed equally to the manuscript and are co-first authors.

### Additional file 1 Electronic search strategies

**Additional file 1 Table S1** Cochrane risk of bias rating of placebo-controlled trials for which effect size data were reported

**Additional file 1 Table S2** Other efficacy findings

**Additional file 1 Table S3** Main safety findings from meta-analyses and randomized controlled studies

**Additional file 1 Table S4** Summary of findings for changes in body weight, blood pressure, and pulse rate or heart rate compared with placebo during active treatment for ADHD symptoms in randomized controlled trials

## Additional file 1 Electronic search strategies

### Ovid MEDLINE(R) and Epub Ahead of Print, In-Process & Other Non-Indexed Citations

- 1 (adhd or hkd or addh or hyperkine\* or "attention deficit" or hyper-activ\* or hyperactiv\* or overactiv\* or inattentive or impulsiv\*).ti,ab.
- 2 atomoxetine/ or methylphenidate/ or amphetamine/ or Methamphetamine/ or Dextroamphetamine/ or dexmethylphenidate/
- 3 ((extended-release adj1 guanfacine) or ("extended release" adj1 guanfacine) or GXR or intuniv or atomoxetine or ritalin or methylphenidate or strattera or lisdexamfetamine or vyvanse or focalin or concerta or adderall or dexmethylphenidate or dextroamphetamine or dexamphetamine or mixed-amphetamine or "mixed amphetamine").mp.
- 4 1 and (2 or 3)
- 5 Asperger Syndrome/ or Autistic Disorder/ or Autism Spectrum Disorder/ or (asperger\* or autis\*).mp.
- 6 Tic Disorders/ or (tic\* or tourette\*).mp.
- 7 "Attention Deficit and Disruptive Behavior Disorders"/ or (oppositional or defiant or disruptive or conduct).mp.
- 8 Depression/ or ("major depression" or "major depressive").ti,ab.
- 9 Anxiety Disorders/ or anxiety.ti,ab.
- 10 5 or 6 or 7 or 8 or 9
- 11 4 and 10
- 12 exp rodent/ or exp dogs/ or exp cats/ or exp rabbits/ or exp horses/ or exp ruminants/ or exp swine/ or exp InVitro, techniques/ or exp cells, cultured/ or exp stem cell research/ or exp animal experimentation/ or exp disease models, animals/ or exp models, animal/ or exp animal tissue/ or (rat\* or mice or mouse or cat\* or dog\* or vitro or vivo or animal\*).ti.
- 13 (animals not human).tw.
- 14 12 or 13
- 15 11 not 14
- 16 (genetic or gene or polymorphism or congenital or epilep\* or nicotine or pregnan\*).ti,ab.
- 17 15 not 16
- 18 limit 17 to (address or autobiography or bibliography or biography or clinical conference or clinical trial, veterinary or clinical trials, veterinary as topic or clinical trial protocol or clinical trial protocols as topic or congress or consensus development conference or consensus development conference, nih or dataset or dictionary or directory or "expression of concern" or government document or interactive tutorial or interview or lecture or legal case or legislation or news or newspaper article or observational study, veterinary or patient education handout or personal narrative or portrait or "review" or video-audio media or webcasts)
- 19 (meta-analysis or metaanalysis or pooled or (systematic adj review)).mp.
- 20 18 and 19
- 21 (17 not 18) or 20

## Embase

- 1 (adhd or hkd or addh or hyperkine\* or "attention deficit" or hyper-activ\* or hyperactiv\* or overactiv\* or inattentive or impulsiv\*).ti,ab.
- 2 (GXR or intuniv or atomoxetine or ritalin or methylphenidate or strattera or lisdexamfetamine or vyvance or focalin or concerta or adderall or dexmethylphenidate or dextroamphetamine or dexamphetamine or mixed-amphetamine or "mixed amphetamine").mp.
- 3 (extended-release or "extended release").ti,ab.
- 4 guanfacine.mp.
- 5 3 and 4
- 6 exp atomoxetine/ or exp methylphenidate/ or exp amphetamine/ or exp dexmethylphenidate/ or exp dexamphetamine/ or exp methamphetamine/
- 7 1 and (2 or 5 or 6)
- 8 autis\*.mp. or autism/
- 9 Asperger syndrome/ or asperger\*.mp.
- 10 tic/ or Gilles de la Tourette syndrome/ or (tic\* or tourette\*).mp.
- 11 oppositional defiant disorder/ or (oppositional or defiant or disruptive or conduct).mp.
- 12 anxiety disorder/ or generalized anxiety disorder/ or anxiety.ti,ab.
- 13 major depression/ or adolescent depression/ or ("major depression" or "major depressive").ti,ab.
- 14 8 or 9 or 10 or 11 or 12 or 13
- 15 7 and 14
- 16 exp rodent/ or exp dogs/ or exp cats/ or exp rabbits/ or exp horses/ or exp ruminants/ or exp swine/ or exp InVitro, techniques/ or exp cells, cultured/ or exp stem cell research/ or exp animal experimentation/ or exp disease models, animals/ or exp models, animal/ or exp animal tissue/ or (rat\* or mice or mouse or cat\* or dog\* or vitro or vivo or animal\*).ti.
- 17 (animals not human).tw.
- 18 16 or 17
- 19 15 not 18
- 20 (genetic or gene or polymorphism or congenital or epilep\* or nicotine or pregnan\*).ti,ab.
- 21 19 not 20
- 22 limit 21 to (books or chapter or conference abstract or conference paper or "conference review" or tombstone)
- 23 21 not 22
- 24 limit 23 to (books or chapter or conference abstract or conference paper or "conference review" or "review" or short survey or tombstone)
- 25 (meta-analysis or metaanalysis or pooled or (systematic adj review)).mp.
- 26 24 and 25
- 27 23 not 24
- 28 26 or 27

**Additional file 1 Table S1** Cochrane risk of bias rating of placebo-controlled trials for which effect size data were reported

| Item                          | Allen, 2005* | Bangs, 2007* | Connor, 2010* | Geller, 2007* | Griffiths, 2018 | Harfterkamp, 2012 | Kaplan, 2004 | Newcorn, 2005 | Scahill, 2001 | Scahill, 2015 |
|-------------------------------|--------------|--------------|---------------|---------------|-----------------|-------------------|--------------|---------------|---------------|---------------|
| Sequence generation           | -            | -            | -             | -             | -               | -                 | -            | ?             | ?             | ?             |
| Allocation concealment        | -            | -            | -             | -             | -               | -                 | -            | ?             | ?             | -             |
| Blinding participants/parents | -            | -            | -             | -             | -               | -                 | -            | ?             | -             | ?             |
| Blinding therapist            | -            | -            | -             | -             | -               | -                 | -            | ?             | -             | -             |
| Blinding assessor             | -            | -            | -             | -             | -               | -                 | -            | ?             | -             | -             |
| Incomplete data outcome       | -            | -            | -             | -             | -               | -                 | ?            | ?             | ?             | -             |
| Selective reporting           | +            | -            | -             | +             | ?               | -                 | ?            | ?             | ?             | -             |

\* Risk of bias assessed by Cortese et al, Lancet Psychiatry. 2018;5(9):727-38.  
 Green/-, low risk of bias; Red/+, high risk of bias; Yellow/?, unknown risk of bias.

**Additional file 1 Table S2** Other efficacy findings

| Citation                             | Study design                                                       | Number of patients                  | Comorbidities                                                 | Main findings for CGI for ADHD                                                                                                                                                                                                                                                                                                                                                                                                            |
|--------------------------------------|--------------------------------------------------------------------|-------------------------------------|---------------------------------------------------------------|-------------------------------------------------------------------------------------------------------------------------------------------------------------------------------------------------------------------------------------------------------------------------------------------------------------------------------------------------------------------------------------------------------------------------------------------|
| <b>Autism spectrum disorder</b>      |                                                                    |                                     |                                                               |                                                                                                                                                                                                                                                                                                                                                                                                                                           |
| Pearson, 2013 [43]                   | RCT – crossover<br>MPHs vs PBO                                     | <i>n</i> = 24                       | Autistic disorder: 79.2%<br>PDD-NOS: 8.3%<br>Asperger: 12.5%  | <ul style="list-style-type: none"> <li>Significantly greater improvements in CGI-I scores were found by the psychiatrist (<math>F[3,69]=15.49, P &lt; 0.001</math>) and psychologist (<math>F[3,69]=12.62, P &lt; 0.001</math>) with MPHs; CGI-S scores significantly improved with MPHs as assessed by the psychiatrist (<math>F[3,69]=7.62, P &lt; 0.001</math>) and psychologist (<math>F[3,69]=12.46, P &lt; 0.001</math>)</li> </ul> |
| Patra, 2019 [18]                     | MA<br>ATX vs PBO                                                   | <i>n</i> = 241                      | NR                                                            | <ul style="list-style-type: none"> <li>Significantly greater improvement in CGI-I with ATX (relative risk 2.37 [95% CI: 1.38, 4.06])</li> </ul>                                                                                                                                                                                                                                                                                           |
| Harfterkamp, 2012 [38]               | RCT – parallel<br>ATX vs PBO                                       | <i>n</i> = 97<br>OLE, <i>n</i> = 88 | Autistic disorder: 59.8%<br>PDD-NOS: 33.0%<br>Asperger: 5.2%  | <ul style="list-style-type: none"> <li>CGI-ADHD-I response rate numerically higher for ATX (20.9% vs 8.7%)</li> </ul>                                                                                                                                                                                                                                                                                                                     |
| NCT00498173 [41]                     | RCT – parallel<br>ATX vs PBO                                       | <i>n</i> = 60                       | Autistic disorder: 38.3%<br>PDD-NOS: 38.3%<br>Asperger: 23.3% | NR                                                                                                                                                                                                                                                                                                                                                                                                                                        |
| Handen, 2015 [36]                    | RCT – parallel<br>ATX±parent training<br>vs PBO±parent<br>training | <i>n</i> = 128                      | Autistic disorder: 44.5%<br>PDD-NOS: 39.1%<br>Asperger: 16.4% | <ul style="list-style-type: none"> <li>CGI-ADHD-I response rate significantly higher for ATX with or without parent training (48.4%, 46.9% vs 29.0%, 19.4%)</li> </ul>                                                                                                                                                                                                                                                                    |
| Scahill, 2015 [45]                   | RCT – parallel<br>GXR vs PBO                                       | <i>n</i> = 62                       | Autistic disorder: 82.3%<br>PDD-NOS: 14.5%<br>Asperger: 3.2%  | <ul style="list-style-type: none"> <li>CGI-I response rate significantly higher with GXR (50.0% vs 9.4%), <math>P = 0.0001</math></li> </ul>                                                                                                                                                                                                                                                                                              |
| Handen, 2008 [37]                    | RCT – crossover<br>GXR vs PBO                                      | <i>n</i> = 11                       | Intellectual disability or autism                             | <ul style="list-style-type: none"> <li>Significantly greater improvements in CGI-I scores for GXR (<math>2.82±0.9</math> vs <math>3.82±0.6, P &lt; 0.005</math>), but not CGI-S (<math>4.36±0.5</math> vs <math>4.82±0.6, P &lt; 0.070</math>)</li> </ul>                                                                                                                                                                                 |
| <b>Oppositional defiant disorder</b> |                                                                    |                                     |                                                               |                                                                                                                                                                                                                                                                                                                                                                                                                                           |
| Spencer, 2006 [46]                   | RCT – parallel<br>AMPs vs PBO                                      | <i>n</i> = 308                      | ODD: 79.2%                                                    | <ul style="list-style-type: none"> <li>Significantly greater improvements in CGI-ADHD-I scores with AMPs 20 mg (61.9%, <math>P &lt; 0.001</math>), 30 mg (54.9%, <math>P &lt; 0.008</math>), and 40 mg (60.4%, <math>P &lt; 0.001</math>) vs PBO (26.5%)</li> </ul>                                                                                                                                                                       |
| Schwartz, 2014 [20]                  | MA<br>ATX vs PBO                                                   | <i>n</i> = 3697                     | ODD: various%                                                 | <ul style="list-style-type: none"> <li>Standardized mean difference for CGI-ADHD-I: <math>-0.55</math> ([95% CI: <math>-0.66, -0.44</math>], <math>P &lt; 0.0001</math>). Standardized mean difference for CGI-ADHD-S: <math>-0.57</math> ([95% CI: <math>-0.71, -0.44</math>], <math>P &lt; 0.0001</math>)</li> </ul>                                                                                                                    |
| Cheng, 2007 [17]                     | MA<br>ATX vs PBO                                                   | <i>n</i> = 213                      | ODD: NR%                                                      | <ul style="list-style-type: none"> <li>Significantly greater improvements in CGI-S scores with ATX (standardized mean difference: <math>-0.598</math> [95% CI: <math>-0.849, -0.347</math>], <math>P &lt; 0.05</math>)</li> </ul>                                                                                                                                                                                                         |
| Newcorn, 2005 [42]                   | RCT – parallel<br>ATX vs PBO                                       | <i>n</i> = 115                      | ODD: 100%                                                     | <ul style="list-style-type: none"> <li>Significantly greater improvements in CGI-ADHD-S scores with ATX 1.8 mg/kg (mean change from baseline <math>-1.2, P = 0.04</math>)</li> </ul>                                                                                                                                                                                                                                                      |
| Kaplan, 2004 [39]                    | RCT – pooled<br>ATX vs PBO                                         | <i>n</i> = 98                       | ODD: 100%                                                     | <ul style="list-style-type: none"> <li>Significantly greater improvements in CGI-ADHD-S scores with ATX (mean change from baseline <math>-1.5±1.5</math> vs <math>-0.7±1.1, P = 0.003</math>)</li> </ul>                                                                                                                                                                                                                                  |

| Citation                                                          | Study design                                       | Number of patients | Comorbidities                                                                      | Main findings for CGI for ADHD                                                                                                                                                                                                                                                                                     |
|-------------------------------------------------------------------|----------------------------------------------------|--------------------|------------------------------------------------------------------------------------|--------------------------------------------------------------------------------------------------------------------------------------------------------------------------------------------------------------------------------------------------------------------------------------------------------------------|
| Bangs, 2008 [30]                                                  | RCT – parallel<br>ATX vs PBO                       | <i>n</i> = 226     | ODD: 100%                                                                          | <ul style="list-style-type: none"> <li>Significantly greater improvements in CGI-I (mean change from baseline 3.5±1.4 vs 3.9±1.0, <i>P</i> = 0.037) and CGI-S (mean change from baseline –0.7±1.4 vs –0.3±1.1, <i>P</i> = 0.013) scores with ATX</li> </ul>                                                        |
| Dell'Agnello, 2009 [32]                                           | RCT – parallel<br>ATX vs PBO                       | <i>n</i> = 137     | ODD: 100%                                                                          | <ul style="list-style-type: none"> <li>Significantly greater improvements in CGI-ADHD-S scores with ATX (4.5±1.0 vs 5.2±1.0, <i>P</i> &lt; 0.001)</li> </ul>                                                                                                                                                       |
| Dittman, 2011 [33]                                                | RCT – parallel<br>ATX vs PBO                       | <i>n</i> = 180     | ODD: 100%                                                                          | <ul style="list-style-type: none"> <li>Significantly greater improvements in CGI-S scores with ATX (least squares mean treatment group difference –0.7 [95% CI: –1.1, –0.4], effect size –0.21, <i>P</i> &lt; 0.001)</li> </ul>                                                                                    |
| Connor, 2010 [31]                                                 | RCT – parallel<br>GXR vs PBO                       | <i>n</i> = 217     | ODD: 100%                                                                          | NR                                                                                                                                                                                                                                                                                                                 |
| <b>Tourette's disorder and other tic disorders</b>                |                                                    |                    |                                                                                    |                                                                                                                                                                                                                                                                                                                    |
| Tourette's Syndrome Study Group, 2002 [40]                        | RCT – parallel<br>MPHs vs CLON vs MPHs+CLON vs PBO | <i>n</i> = 136     | Tourette: 94%<br>Motor tic: 5%<br>Vocal tic: 6%<br>ODD: 38% <sup>†</sup>           | <ul style="list-style-type: none"> <li>CGI-ADHD-I response rate (investigator-rated) significantly higher for all treatment groups compared with PBO (MPHs: 80.6%, CLON: 60.6%, MPHs+CLON: 87.5%, PBO: 32.3%)</li> </ul>                                                                                           |
| Allen, 2005 [28]                                                  | RCT – parallel<br>ATX vs PBO                       | <i>n</i> = 148     | Tourette: 79.1%<br>Motor tic: 29.7%<br>Vocal tic: 17.6%<br>ODD: 21.6% <sup>†</sup> | <ul style="list-style-type: none"> <li>Significantly greater improvements in CGI-ADHD/Psych-S (mean change from baseline –0.8±1.1, <i>P</i> &lt; 0.001 vs –0.3±1.0, <i>P</i> = 0.008) and CGI-S scores (mean change from baseline –0.6±1.1, <i>P</i> &lt; 0.001 vs –0.2±0.9, <i>P</i> = 0.054) with ATX</li> </ul> |
| Scahill, 2001 [44]                                                | RCT – parallel<br>GXR vs PBO                       | <i>n</i> = 34      | Tourette: 59.0%<br>Motor tic: 35.3%                                                | <ul style="list-style-type: none"> <li>CGI-I response rate significantly higher with GXR (52.9% vs 0.0%), <i>P</i> &lt; 0.001</li> </ul>                                                                                                                                                                           |
| <b>Generalized anxiety disorder and major depressive disorder</b> |                                                    |                    |                                                                                    |                                                                                                                                                                                                                                                                                                                    |
| Geller, 2007 [34]                                                 | RCT – parallel<br>ATX vs PBO                       | <i>n</i> = 113     | Anxiety: 100%                                                                      | <ul style="list-style-type: none"> <li>Significantly greater improvements in CGI-S scores with ATX (mean change from baseline –0.9±1.2, <i>P</i> = 0.002)</li> </ul>                                                                                                                                               |
| Griffiths, 2018 [35]                                              | RCT – crossover<br>ATX vs PBO                      | <i>n</i> = 38      | Anxiety: 100%<br>ODD: 55.3% <sup>†</sup>                                           | NR                                                                                                                                                                                                                                                                                                                 |
| Bangs, 2007 [29]                                                  | RCT – parallel<br>ATX vs PBO                       | <i>n</i> = 142     | MDD: 100%                                                                          | <ul style="list-style-type: none"> <li>CGI-I response rate significantly higher with ATX (47.8% vs 17.9%, <i>P</i> &lt; 0.001)</li> <li>CGI-S response rate not significantly higher with ATX (18.8% vs 10.4%, <i>P</i> = 0.23)</li> </ul>                                                                         |

<sup>†</sup>In addition to the comorbidity of interest and reported in ≥20% of patients.

ADHD, attention-deficit hyperactivity disorder; AMPs, amphetamine or a derivative; ATX, atomoxetine; CGI-I, Clinical Global Impression – Improvement; CGI-S, Clinical Global Impression – Severity; CI, confidence interval; CLON, clonidine; GXR, guanfacine extended-release; MA, meta-analysis; MDD, major depressive disorder; MPHs, methylphenidate or a derivative; ODD, oppositional defiant disorder; OLE, open-label extension; PBO, placebo; PDD-NOS, pervasive developmental disorder-not otherwise specified; RCT, randomized controlled trial.

**Additional file 1 Table S3** Main safety findings from meta-analyses and randomized controlled studies

| Citation                        | Study design                                                                          | Number of patients                                                        | Adverse events with significantly or clinically relevant higher frequency compared with PBO                                                                                                                                                                                                                                                                                                                                                                      | Changes in weight                                                                                               | Changes in blood pressure                                                                                       | Other cardiovascular events                                                                                     |
|---------------------------------|---------------------------------------------------------------------------------------|---------------------------------------------------------------------------|------------------------------------------------------------------------------------------------------------------------------------------------------------------------------------------------------------------------------------------------------------------------------------------------------------------------------------------------------------------------------------------------------------------------------------------------------------------|-----------------------------------------------------------------------------------------------------------------|-----------------------------------------------------------------------------------------------------------------|-----------------------------------------------------------------------------------------------------------------|
| <b>Autism spectrum disorder</b> |                                                                                       |                                                                           |                                                                                                                                                                                                                                                                                                                                                                                                                                                                  |                                                                                                                 |                                                                                                                 |                                                                                                                 |
| Reichow, 2013 [19]              | MA – 3 trials[66, 84, 92]<br>MPHs vs PBO                                              | NR                                                                        | Significantly greater risk of:<br>Decreased appetite (ARD = 0.17 [95% CI: 0.03, 0.31]; NNH = 5.9 [95% CI: 3.2, 33.3])<br>Insomnia (ARD = 0.19 [95% CI: 0.02, 0.36]; NNH = 5.3 [95% CI: 2.8, 5.0])<br>Depressive symptoms (ARD = 0.07 [95% CI: 0.004, 0.13]; NNH = 14.3 [95% CI: 7.7, 250])<br>Irritability (ARD = 0.14 [95% CI: 0.05, 0.24]; NNH = 7.1 [95% CI: 4.2, 20])<br>Social withdrawal (ARD = 0.07 [95% CI: 0.002, 0.15]; NNH = 14.3 [95% CI: 6.7, 500]) | NR                                                                                                              | NR                                                                                                              | NR                                                                                                              |
| Pearson, 2013 [43]              | RCT – crossover<br>MPHs 0.21, 0.35, 0.48 mg/kg<br>PBO                                 | <i>n</i> = 24                                                             | Appetite loss (29–38%)<br>Trouble sleeping (29–50%)                                                                                                                                                                                                                                                                                                                                                                                                              | <ul style="list-style-type: none"> <li>No significant changes in weight compared PBO</li> </ul>                 | <ul style="list-style-type: none"> <li>No significant changes in blood pressure compared with PBO</li> </ul>    | <ul style="list-style-type: none"> <li>No significant changes in pulse rate compared with PBO</li> </ul>        |
| Kim, 2017 [70]                  | RCT – parallel<br>MPHs 0.3 mg/kg<br>MPHs 0.6 mg/kg                                    | <i>n</i> = 9<br><i>n</i> = 18                                             | No dose-related increase in severe AEs (RISC-K)<br>No suicidal behavior (C-SSRS)                                                                                                                                                                                                                                                                                                                                                                                 | <ul style="list-style-type: none"> <li>No significant or clinically relevant changes in either group</li> </ul> | <ul style="list-style-type: none"> <li>No significant or clinically relevant changes in either group</li> </ul> | <ul style="list-style-type: none"> <li>No significant or clinically relevant changes in either group</li> </ul> |
| Handen, 2000 [66]               | RCT – crossover<br>MPHs 0.3 mg/kg<br>MPHs 0.6 mg/kg<br>PBO                            | <i>n</i> = 13                                                             | ≥5% increase in frequency (significance NR)<br>Sad, unhappy, depressed (45.5%, 70%)<br>Irritable, crabby, touchy, whiny (54.5%, 70%)<br>Poor appetite (72.7%, 70%)<br>Drowsy, dull, not alert (45.5%, 40%)<br>Difficulty falling asleep 10.6–18.2% (all doses)                                                                                                                                                                                                   | NR                                                                                                              | NR                                                                                                              | NR                                                                                                              |
| RUPP, 2005 [84]                 | RCT – crossover<br>MPHs 2.5–5 mg/kg<br>MPHs 2.5–10 mg/kg<br>MPHs 5–20 mg/kg<br>vs PBO | RCT, <i>n</i> = 66<br>OLE, <i>n</i> = 34                                  | Decreased appetite 24.2–24% (med–high doses)<br>Irritability 12.1% (med dose)<br>Emotional outburst 13.6% (med dose)                                                                                                                                                                                                                                                                                                                                             | NR                                                                                                              | NR                                                                                                              | NR                                                                                                              |
| Patra, 2019 [18]                | MA – 3 trials[36, 38, 50]<br>ATX vs PBO                                               | <i>n</i> = 241                                                            | Relative risk [95% CI]<br>Nausea and vomiting 1.91 [1.24, 2.94]<br>Decreased sleep 1.79 [1.19, 2.70]<br>Decreased appetite 1.79 [1.17, 2.73]                                                                                                                                                                                                                                                                                                                     | NR                                                                                                              | NR                                                                                                              | NR                                                                                                              |
| Harfterkamp, 2012[38] 2013 [67] | RCT – parallel<br>ATX (1.2 mg/kg/day)<br>vs PBO                                       | RCT<br>ATX, <i>n</i> = 48<br>PBO, <i>n</i> = 49<br><br>OLE, <i>n</i> = 88 | RCT phase<br>Decreased appetite 27.1%<br>Early morning awakening 10.4%<br>Nausea 29.2%<br><br>OLE phase<br>Most AEs during the first 8 weeks of treatment decreased in frequency during the following 20 weeks of treatment. There were significant decreases in fatigue (from 18.2% to 6.8%) and nausea (13.6% to 1.1%)                                                                                                                                         | NR                                                                                                              | NR                                                                                                              | NR                                                                                                              |

| Citation           | Study design                                      | Number of patients                                                          | Adverse events with significantly or clinically relevant higher frequency compared with PBO                                                                                                                                                                                                                                                      | Changes in weight                                 | Changes in blood pressure                                                                             | Other cardiovascular events                                                                                   |
|--------------------|---------------------------------------------------|-----------------------------------------------------------------------------|--------------------------------------------------------------------------------------------------------------------------------------------------------------------------------------------------------------------------------------------------------------------------------------------------------------------------------------------------|---------------------------------------------------|-------------------------------------------------------------------------------------------------------|---------------------------------------------------------------------------------------------------------------|
| NCT00498173 [41]   | RCT – parallel<br>ATX vs PBO                      | ATX, <i>n</i> = 29<br>PBO, <i>n</i> = 31                                    | ≥5% increase in frequency (significance NR)<br>Constipation 10.3%<br>Decreased appetite 31.0%<br>Difficulty falling asleep 20.7%<br>Emotional outburst 17.2%<br>Nasal congestion/cold 13.8%<br>Restlessness/agitation 13.8%<br>Sedation/drowsiness 27.6%<br>Self-injurious behaviour 20.7%<br>Stomach discomfort 13.8%<br>Decreased appetite 47% | NR                                                | NR                                                                                                    | NR                                                                                                            |
| Handen, 2015 [36]  | RCT – parallel<br>ATX (1.8 mg/kg/day)<br>vs PBO   | <i>n</i> = 32 in<br>each group<br>(e.g., ATX,<br>ATX+PT,<br>PBO+PT,<br>PBO) |                                                                                                                                                                                                                                                                                                                                                  | NR                                                | NR                                                                                                    | NR                                                                                                            |
| Arnold, 2006 [50]  | RCT – crossover<br>ATX (≤1.4<br>mg/kg/day) vs PBO | <i>n</i> = 16                                                               | Nausea/vomiting 31%<br>Upset stomach 31%<br>Fatigue 31%<br>Racing heart 19%<br>Appetite suppression 38%                                                                                                                                                                                                                                          | • No significant<br>differences between<br>groups | • No significant<br>differences between<br>groups                                                     | • Significantly higher<br>heart rate with ATX                                                                 |
| Handen, 2008 [37]  | RCT – crossover<br>GXR (≤3 mg/day) vs<br>PBO      | <i>n</i> = 11                                                               | No significant differences in frequency or severity of<br>pooled adverse effects                                                                                                                                                                                                                                                                 | NR                                                | • No significant<br>differences between<br>groups ( <i>n</i> = 6)                                     | • No significant<br>differences in pulse<br>rate between groups<br>( <i>n</i> = 6)                            |
| Scahill, 2015 [45] | RCT – parallel<br>GXR (≤4 mg/day) vs<br>PBO       | GXR, <i>n</i> = 30<br>PBO, <i>n</i> = 32                                    | Anxiety 30%<br>Decreased appetite 43.3%<br>Drowsiness 86.7%<br>Dry mouth 40%<br>Emotional/tearful 40%<br>Irritability 36.7%<br>Fatigue 63.3%<br>Mid-sleep awakening 30%                                                                                                                                                                          | NR                                                | • Frequency of<br>decreased blood<br>pressure<br>significantly higher<br>with GXR (53.3% vs<br>28.1%) | • Frequency of sinus<br>bradycardia higher<br>with GXR<br>• Mean decrease in<br>pulse rate higher with<br>GXR |

#### Oppositional defiant disorder

|                    |                                                             |                |                                                                                                                                                                                                                                                                                          |                                               |                                     |                                                            |
|--------------------|-------------------------------------------------------------|----------------|------------------------------------------------------------------------------------------------------------------------------------------------------------------------------------------------------------------------------------------------------------------------------------------|-----------------------------------------------|-------------------------------------|------------------------------------------------------------|
| Spencer, 2006 [46] | RCT – parallel<br>AMPs (10, 20, 30, or<br>40 mg/day)<br>PBO | <i>n</i> = 308 | ≥5% increase in frequency (significance NR)<br>Anorexia/decreased appetite 16.7–37.9%<br>Abdominal pain 10.3–14.5%<br>Emotional lability 3.3–8.7%<br>Headache 26.2% – highest dose only<br>Insomnia 13.3–27.9%<br>Nervousness 5.0–8.2%<br>Pharyngitis 2.9–11.5%<br>Weight loss 3.3–14.8% | • Significant decrease<br>in weight with AMPs | • No clinically<br>relevant changes | • No clinically relevant<br>changes in ECG<br>measurements |
|--------------------|-------------------------------------------------------------|----------------|------------------------------------------------------------------------------------------------------------------------------------------------------------------------------------------------------------------------------------------------------------------------------------------|-----------------------------------------------|-------------------------------------|------------------------------------------------------------|

| Citation                | Study design                                                                | Number of patients                        | Adverse events with significantly or clinically relevant higher frequency compared with PBO                                                                                                                                      | Changes in weight                                                                                                                                        | Changes in blood pressure                                                                                                                                  | Other cardiovascular events                                                                                                                     |
|-------------------------|-----------------------------------------------------------------------------|-------------------------------------------|----------------------------------------------------------------------------------------------------------------------------------------------------------------------------------------------------------------------------------|----------------------------------------------------------------------------------------------------------------------------------------------------------|------------------------------------------------------------------------------------------------------------------------------------------------------------|-------------------------------------------------------------------------------------------------------------------------------------------------|
| Jahangard, 2017 [68]    | RCT – parallel MPHs vs MPHs+risperidone                                     | <i>n</i> = 84                             | NR                                                                                                                                                                                                                               | <ul style="list-style-type: none"> <li>Significant changes in weight over time (5.7% increase with MPHs+risperidone, 2.4% decrease with MPHs)</li> </ul> | <ul style="list-style-type: none"> <li>No significant differences between groups (significant increase in both groups)</li> </ul>                          | <ul style="list-style-type: none"> <li>No significant differences in pulse rate between groups (significant increase in both groups)</li> </ul> |
| Kolko, 1999 [72]        | RCT – crossover MPHs (0.3 or 0.6 mg/kg) vs PBO                              | <i>n</i> = 20                             | Stimulant Drug Side Effects Rating Scale:<br>No significant differences in the frequency or severity of side-effect symptoms between MPHs and PBO                                                                                | NR                                                                                                                                                       | NR                                                                                                                                                         | NR                                                                                                                                              |
| Klorman, 1990 [71]      | RCT – crossover MPHs vs PBO                                                 | <i>n</i> = 48                             | Decreased appetite 29.8%<br>Dry mouth 19.1%<br>Shakiness 8.5%                                                                                                                                                                    | <ul style="list-style-type: none"> <li>Significant decrease in weight (<i>P</i> &lt; 0.05)</li> </ul>                                                    | NR                                                                                                                                                         | NR                                                                                                                                              |
| Connor, 2000 [55]       | RCT – parallel MPHs (≤40 mg/day) CLON (≤0.3 mg/day) MPHs+CLON               | <i>n</i> = 8 in each group                | Severity of side effects decreased over time in all groups                                                                                                                                                                       | <ul style="list-style-type: none"> <li>No significant differences in weight over time in either group</li> </ul>                                         | NR                                                                                                                                                         | <ul style="list-style-type: none"> <li>No significant differences in pulse rate over time in either group</li> </ul>                            |
| Garg, 2015 [63]         | RCT – parallel MPHs vs PBO                                                  | MPHs, <i>n</i> = 15<br>ATX, <i>n</i> = 22 | No significant differences between groups                                                                                                                                                                                        | NR                                                                                                                                                       | NR                                                                                                                                                         | NR                                                                                                                                              |
| Kaplan, 2004 [39]       | RCT – pooled ATX (≤2 mg/kg) vs PBO                                          | ATX, <i>n</i> = 53<br>PBO, <i>n</i> = 45  | Decreased appetite 18.9%<br>Emotional lability 11.3%                                                                                                                                                                             | NR                                                                                                                                                       | NR                                                                                                                                                         | NR                                                                                                                                              |
| Bangs, 2008 [30]        | RCT – parallel ATX vs PBO<br><br>RCT ≤1.2 mg/kg/day<br>OLE ≤1.4 mg/kg/day   | ATX, <i>n</i> = 156<br>PBO, <i>n</i> = 70 | Decreased appetite 24.4%<br>Nausea 20.5%<br>Fatigue 17.3%                                                                                                                                                                        | <ul style="list-style-type: none"> <li>Rates of weight decrease significantly higher with ATX (change from baseline: 3.5% vs 2.9%)</li> </ul>            | <ul style="list-style-type: none"> <li>Frequency of clinically significant blood pressure increase significantly higher with ATX (9.7% vs 1.6%)</li> </ul> | NR                                                                                                                                              |
| Dell'Agnello, 2009 [32] | RCT – parallel ATX (1.2 mg/day) vs PBO                                      | ATX, <i>n</i> = 105<br>PBO, <i>n</i> = 32 | Anorexia 33.6%<br>Nausea 20.6%<br>Somnolence 29.9%                                                                                                                                                                               | <ul style="list-style-type: none"> <li>Significantly greater decrease in weight with ATX</li> </ul>                                                      | <ul style="list-style-type: none"> <li>No significant differences in blood pressure</li> </ul>                                                             | <ul style="list-style-type: none"> <li>No significant differences in heart rate</li> </ul>                                                      |
| Dittman, 2011 [33]      | RCT – parallel ATX (fast and slow titration, max dose 1.2 mg/kg/day) vs PBO | ATX, <i>n</i> = 121<br>PBO, <i>n</i> = 59 | ≥5% increase in frequency (significance NR) for fast/slow ATX titration<br>Abdominal pain upper 15.0%/13.1%<br>Anorexia 15.0%/11.5%<br>Fatigue 35.0%/21.3%<br>Headache 25.0%/14.8%<br>Nausea 21.7%/19.7%<br>Vomiting 15.0%/18.0% | NR                                                                                                                                                       | NR                                                                                                                                                         | NR                                                                                                                                              |

| Citation                                                 | Study design                                            | Number of patients                        | Adverse events with significantly or clinically relevant higher frequency compared with PBO                                                                                                                                                                                       | Changes in weight                                                                                                                                                                                                                           | Changes in blood pressure                                                                                                                                                                                                                                                  | Other cardiovascular events                                                                                                                                                                                                                                                  |
|----------------------------------------------------------|---------------------------------------------------------|-------------------------------------------|-----------------------------------------------------------------------------------------------------------------------------------------------------------------------------------------------------------------------------------------------------------------------------------|---------------------------------------------------------------------------------------------------------------------------------------------------------------------------------------------------------------------------------------------|----------------------------------------------------------------------------------------------------------------------------------------------------------------------------------------------------------------------------------------------------------------------------|------------------------------------------------------------------------------------------------------------------------------------------------------------------------------------------------------------------------------------------------------------------------------|
| Connor, 2010 [31]                                        | RCT – parallel GXR (1–4 mg/day) vs PBO                  | GXR, <i>n</i> = 138<br>PBO, <i>n</i> = 79 | ≥5% increase in frequency (significance NR) Abdominal pain upper 11.8%<br>Fatigue 11.0%<br>Headache 22.1%<br>Irritability 7.4%<br>Sedation 13.2%<br>Somnolence 50.7%                                                                                                              | NR                                                                                                                                                                                                                                          | <ul style="list-style-type: none"> <li>Frequency of clinically significant blood pressure decrease higher with ATX (5.9% vs 1.3%)</li> </ul>                                                                                                                               | <ul style="list-style-type: none"> <li>Greater decreases in heart rate with GXR</li> <li>Frequency of decreased heart rate (&lt;50 bpm) was higher with GXR (5.1% vs 1.3%)</li> <li>No patients on GXR had QTcF or QTcB &gt;500 msec or increase from BL ≥60 msec</li> </ul> |
| <b>Tourette's disorder and other tic disorders</b>       |                                                         |                                           |                                                                                                                                                                                                                                                                                   |                                                                                                                                                                                                                                             |                                                                                                                                                                                                                                                                            |                                                                                                                                                                                                                                                                              |
| Gadow, 2007 [61]<br>Gadow, 2011 [60]<br>Gadow, 1999 [62] | RCT – crossover + OLE MPHs (0.1, 0.3, 0.5 mg/kg) vs PBO | RCT <i>n</i> = 71<br>OLE <i>n</i> = 34    | NR                                                                                                                                                                                                                                                                                | <ul style="list-style-type: none"> <li>RCT: 6 wk Significant decrease in weight with increasing dose</li> <li>OLE: 2 y No significant or clinically relevant differences in expected vs actual weight gain (difference: 0.72 kg)</li> </ul> | <ul style="list-style-type: none"> <li>RCT: 6 wk Significant increase in diastolic blood pressure with increasing dose</li> <li>OLE: 2 y Significant change in systolic (+6 mmHg) but not diastolic (–3 mmHg) blood pressure Not considered clinically relevant</li> </ul> | <ul style="list-style-type: none"> <li>RCT: 6 wk Significant increase in heart rate with increasing dose</li> <li>OLE: 2 y Significant increase in heart rate (~10 bpm) Not considered clinically relevant</li> </ul>                                                        |
| Castellanos, 1997 [52]                                   | RCT – crossover MPHs vs AMPs vs PBO                     | <i>n</i> = 20                             | Decreased appetite with transient weight loss (MPHs 15%, AMPs 20%)<br>Insomnia (MPHs 10%, AMPs 50%, PBO 5%)<br><br>Transient obsessive-compulsive symptoms (MPHs 25%, AMPs 5%)                                                                                                    | NR                                                                                                                                                                                                                                          | NR                                                                                                                                                                                                                                                                         | NR                                                                                                                                                                                                                                                                           |
| Bloch, 2009 [16]                                         | MA – 4 trials[40, 52, 61] MPHs vs PBO                   | <i>n</i> = 191                            | No difference in tic severity; noted that AEs were not well described in the included studies                                                                                                                                                                                     | NR                                                                                                                                                                                                                                          | NR                                                                                                                                                                                                                                                                         | NR                                                                                                                                                                                                                                                                           |
| Law, 1999 [76]                                           | RCT – parallel MPHs (0.7 mg/kg BID) vs PBO              | MPHs, <i>n</i> = 46<br>PBO, <i>n</i> = 45 | Target dose of 0.7 mg/kg MPHs not reached because of adverse effects at doses >0.5 mg/kg<br><br>Onset of new clinically significant tics in patients without pre-existing tics: MPHs 19.6% vs PBO 16.7%, not significant<br><br>Worsening of pre-existing tics: MPHs 33%, PBO 33% | NR                                                                                                                                                                                                                                          | NR                                                                                                                                                                                                                                                                         | NR                                                                                                                                                                                                                                                                           |

| Citation                                                             | Study design                                      | Number of patients                                                                                                 | Adverse events with significantly or clinically relevant higher frequency compared with PBO                                                                                                                                                                | Changes in weight                                                                                                                                                                                                                                                                                                       | Changes in blood pressure                                                                                             | Other cardiovascular events                                                                                                                                                                                                                                                                                                                                                      |
|----------------------------------------------------------------------|---------------------------------------------------|--------------------------------------------------------------------------------------------------------------------|------------------------------------------------------------------------------------------------------------------------------------------------------------------------------------------------------------------------------------------------------------|-------------------------------------------------------------------------------------------------------------------------------------------------------------------------------------------------------------------------------------------------------------------------------------------------------------------------|-----------------------------------------------------------------------------------------------------------------------|----------------------------------------------------------------------------------------------------------------------------------------------------------------------------------------------------------------------------------------------------------------------------------------------------------------------------------------------------------------------------------|
| Tourette's Syndrome Study Group, 2002 [40]                           | RCT – parallel MPHs, CLON, vs PBO                 | MPHs, <i>n</i> = 37<br>CLON, <i>n</i> = 34<br>PBO, <i>n</i> = 32                                                   | Significant differences NR (sedation higher vs PBO)<br>MPHs+CLON 48%, MPHs 14%, PBO 6%<br><br>Worsening of tics:<br>MPHs 20%, CLON 26%, PBO 22%<br>Tics limited dose increases:<br>MPHs 35%, CLON 18%, PBO 19%<br>Decreased appetite 15.8%<br>Nausea 15.8% | NR                                                                                                                                                                                                                                                                                                                      | NR                                                                                                                    | NR                                                                                                                                                                                                                                                                                                                                                                               |
| Allen, 2005 [28]                                                     | RCT – parallel ATX ( $\leq 1.5$ mg/kg/day) vs PBO | ATX, <i>n</i> = 76<br>PBO, <i>n</i> = 72                                                                           | Decreased appetite 15.8%<br>Nausea 15.8%                                                                                                                                                                                                                   | <ul style="list-style-type: none"> <li>Significant decrease in body weight with ATX</li> <li>Frequency of treatment-emergent weight loss (<math>\geq 3.5\%</math>) higher with ATX (53.3% vs 12.9%, <math>P &lt; 0.001</math>)</li> <li>Frequency of weight loss as an AE was higher with ATX (2.6% vs 0.0%)</li> </ul> | NR                                                                                                                    | <ul style="list-style-type: none"> <li>Significant increase in heart rate with ATX compared with a decrease with PBO</li> <li>Frequency of treatment-emergent increases in heart rate higher with ATX (13.3% vs 2.9%, <math>P = 0.032</math>)</li> <li>Significant decrease in QT interval (Fridericia's corrected) with ATX compared with a slight increase with PBO</li> </ul> |
| Scahill, 2001 [44]                                                   | RCT – parallel GXR ( $\leq 4$ mg/day) vs PBO      | GXR, <i>n</i> = 17<br>PBO, <i>n</i> = 17                                                                           | NR                                                                                                                                                                                                                                                         | <ul style="list-style-type: none"> <li>No significant differences in weight change between groups</li> </ul>                                                                                                                                                                                                            | <ul style="list-style-type: none"> <li>No clinically relevant differences in blood pressure between groups</li> </ul> | <ul style="list-style-type: none"> <li>No clinically relevant differences in pulse rate between groups</li> </ul>                                                                                                                                                                                                                                                                |
| <b>Generalized anxiety disorder and/or major depressive disorder</b> |                                                   |                                                                                                                    |                                                                                                                                                                                                                                                            |                                                                                                                                                                                                                                                                                                                         |                                                                                                                       |                                                                                                                                                                                                                                                                                                                                                                                  |
| Abikoff, 2005 [48]                                                   | RCT – parallel MPHs vs MPHs+fluvoxamine           | MPHs, <i>n</i> = 8<br>MPHs +fluvoxamine, <i>n</i> = 12                                                             | No significant differences between groups                                                                                                                                                                                                                  | NR                                                                                                                                                                                                                                                                                                                      | NR                                                                                                                    | NR                                                                                                                                                                                                                                                                                                                                                                               |
| Diamond, 1999 [56]                                                   | RCT – parallel MPHs (0.7 mg/kg) vs PBO            | <i>n</i> = 91<br>+anxiety<br><i>n</i> = 19 for each group<br>-anxiety<br>MPHs, <i>n</i> = 27<br>PBO, <i>n</i> = 26 | Side effects were grouped: affective, overfocusing, physiological, tics<br><br>There were no differences between patients with and without comorbid anxiety for the difference in side effects between MPHs and PBO                                        | NR                                                                                                                                                                                                                                                                                                                      | NR                                                                                                                    | NR                                                                                                                                                                                                                                                                                                                                                                               |
| Geller, 2007 [34]                                                    | RCT – parallel ATX ( $\leq 1.8$ mg/kg/day) vs PBO | ATX, <i>n</i> = 87<br>PBO, <i>n</i> = 89                                                                           | Decreased appetite 14.3%                                                                                                                                                                                                                                   | <ul style="list-style-type: none"> <li>Significant decrease in body weight with ATX compared with an increase with PBO</li> </ul>                                                                                                                                                                                       | NR                                                                                                                    | <ul style="list-style-type: none"> <li>Significant increase in heart rate with ATX compared with a decrease with PBO</li> </ul>                                                                                                                                                                                                                                                  |

| Citation              | Study design                                      | Number of patients                                   | Adverse events with significantly or clinically relevant higher frequency compared with PBO | Changes in weight                                                                                                                                                                                           | Changes in blood pressure                                                                                                                                                                                                                                                            | Other cardiovascular events                                                                                                                                                                                                                                                      |
|-----------------------|---------------------------------------------------|------------------------------------------------------|---------------------------------------------------------------------------------------------|-------------------------------------------------------------------------------------------------------------------------------------------------------------------------------------------------------------|--------------------------------------------------------------------------------------------------------------------------------------------------------------------------------------------------------------------------------------------------------------------------------------|----------------------------------------------------------------------------------------------------------------------------------------------------------------------------------------------------------------------------------------------------------------------------------|
| Kratochvil, 2005 [73] | RCT – parallel ATX vs ATX+fluoxetine              | ATX, <i>n</i> = 46<br>ATX+fluoxetine, <i>n</i> = 127 | No significant differences for ATX vs ATX+fluoxetine                                        | <ul style="list-style-type: none"> <li>Greater weight loss with ATX+fluoxetine</li> </ul>                                                                                                                   | <ul style="list-style-type: none"> <li>Frequency of marked, sustained increases in blood pressure higher with ATX+fluoxetine</li> </ul>                                                                                                                                              | <ul style="list-style-type: none"> <li>Increase in heart rate higher with ATX+fluoxetine</li> </ul>                                                                                                                                                                              |
| Bangs, 2007 [29]      | RCT – parallel ATX ( $\leq 1.8$ mg/kg/day) vs PBO | ATX, <i>n</i> = 72<br>PBO, <i>n</i> = 70             | Decreased appetite 12.5%<br>Nausea 22.2%                                                    | <ul style="list-style-type: none"> <li>Significant decrease in body weight with ATX compared with an increase with PBO</li> <li>Frequency of weight loss as an AE higher with ATX (8.3% vs 1.4%)</li> </ul> | <ul style="list-style-type: none"> <li>No significant differences between groups</li> <li>At endpoint of OLE, diastolic blood pressure (<math>+2.5 \pm 10.2</math> mmHg, <i>n</i> = 118, <i>P</i> = 0.005) was elevated relative to the start of the OLE in the ATX group</li> </ul> | <ul style="list-style-type: none"> <li>During acute treatment, significant increases in heart rate and decreases in ECG RR and PR intervals with ATX vs PBO</li> <li>During OLE, significant increases in heart rate and decreases in ECG RR interval with ATX vs PBO</li> </ul> |

AE, adverse event; AMPs, amphetamine or a derivative; ARD, absolute risk difference; ATX, atomoxetine; BID, twice daily; bpm, beats per minute; BL, baseline; CI, confidence interval; CLON, clonidine; C-SSRS, Columbia Suicide Severity Rating Scale; ECG, electrocardiogram; ER, extended release; GXR, guanfacine extended-release; MA, meta-analysis; MPHs, methylphenidate or a derivative; NR, not reported; OLE, open-label extension; PR, pulse rate; NNH, number needed to harm; PBO, placebo; PT, parent training; RCT, randomized controlled trial; RISC-K, Response Impressions and Side Effects Checklist-Kids.

**Additional file 1 Table S4** Summary of findings for changes in body weight, blood pressure, and pulse rate or heart rate compared with placebo during active treatment for ADHD symptoms in randomized controlled trials

|                                          | Citation                                    | Treatment | Body weight <sup>†</sup>   | Blood pressure <sup>†</sup>        | HR/PR <sup>†</sup>                 |
|------------------------------------------|---------------------------------------------|-----------|----------------------------|------------------------------------|------------------------------------|
| Autism spectrum disorder                 | No studies                                  | AMPs      | None                       | None                               | None                               |
|                                          | Pearson, 2013 [43]                          | MPHs      | No significant differences | No significant differences         | No significant differences         |
|                                          | Arnold, 2006 [50]                           | ATX       | No significant differences | No significant differences         | Higher HR                          |
|                                          | Scahill, 2015 [45] <sup>‡</sup>             | GXR       | None                       | Lower                              | Lower PR                           |
| Oppositional defiant disorder            | Spencer, 2006 [46]                          | AMPs      | Lower                      | No clinically relevant differences | No clinically relevant differences |
|                                          | Klorman, 1990 [71]                          | MPHs      | Lower                      | None                               | None                               |
|                                          | Bangs, 2008 [30]<br>Dell'Agnello, 2009 [32] | ATX       | Lower                      | Higher systolic<br>No differences  | No significant differences         |
|                                          | Connor, 2010 [31]                           | GXR       | None                       | Lower                              | Lower HR/PR                        |
| Tourette's disorder, other tic disorders | No studies                                  | AMPs      | None                       | None                               | None                               |
|                                          | Gadow, 2007 [61]                            | MPHs      | Lower<br>(dose-related)    | Higher diastolic<br>(dose-related) | High HR<br>(dose-related)          |
|                                          | Allen, 2005 [28]                            | ATX       | Lower                      | NR                                 | Higher HR                          |
|                                          | Scahill, 2001 [44]                          | GXR       | No significant differences | No clinically relevant differences | No clinically relevant differences |
| Generalized anxiety disorder and/or MDD  | No studies                                  | AMPs      | None                       | None                               | None                               |
|                                          | No studies <sup>§</sup>                     | MPHs      | None                       | None                               | None                               |
|                                          | Geller, 2007 [34]<br>Bangs, 2007 [29]       | ATX       | Lower                      | No significant differences         | Higher HR                          |
|                                          | None                                        | GXR       | None                       | None                               | None                               |

<sup>†</sup>Statistically significant or clinically relevant differences compared with placebo.

<sup>‡</sup>Handen, 2008 [37] is not included because the analysis included a subgroup of 6 patients only.

<sup>§</sup>Gadow, 2011 [60] is not included because it was a subgroup analysis.

ADHD, attention-deficit hyperactivity disorder; AMPs, amphetamine or a derivative; ATX, atomoxetine; GXR, guanfacine extended-release; HR, heart rate; MDD, major depressive disorder; MPHs, methylphenidate or a derivative; NR, not reported; PR, pulse rate.
